# Supplementary material for: Effects of the Plant Growth-Promoting Bacterium Burkholderia phytofirmans PsJN throughout the Life Cycle of Arabidopsis thaliana
Source: PLoS One. 2013 Jul 15;8(7):e69435. doi: 10.1371/journal.pone.0069435 (PMC3711820; doi:10.1371/journal.pone.0069435)
Supplement: Table S4 — (XLSX) [file pone.0069435.s007.xlsx]

## Sheet: Up-regulated
ID Affymetrix	Locus	Description	Fold change (Log2)	p-value
245041_at	AT2G26530	AR781	2.74297	0.00132075
245119_at	AT2G41640	transferase, transferring glycosyl groups	2.48105	0.00397727
245250_at	AT4G17490	ATERF6 (ETHYLENE RESPONSIVE ELEMENT BINDING FACTOR 6); DNA binding / transcription factor	3.48809	0
245252_at	AT4G17500	ATERF-1 (ETHYLENE RESPONSIVE ELEMENT BINDING FACTOR 1); DNA binding / transcription activator/ transcription factor	2.23313	0.00661871
245353_at	AT4G16000	unknown protein	1.39761	0.0267164
245397_at	AT4G14560	IAA1 (INDOLE-3-ACETIC ACID INDUCIBLE); protein binding / transcription factor	1.27023	0.0284806
245602_at	AT4G14270	Protein containing PAM2 motif which mediates interaction with the PABC domain of polyadenyl binding proteins.	1.33504	0.0352427
245657_at	AT1G56720	protein kinase family protein	1.25982	0.0291809
245677_at	AT1G56660	unknown protein	1.58944	0.0423952
245692_at	AT5G04150	BHLH101; DNA binding / transcription factor	2.13019	0.00272727
245696_at	AT5G04190	PKS4 (phytochrome kinase substrate 4)	1.21779	0.0322697
245711_at	AT5G04340	ZAT6 (ZINC FINGER OF ARABIDOPSIS THALIANA 6); nucleic acid binding / transcription factor/ zinc ion binding	2.52133	0.00325301
245731_at	AT1G73500	MKK9 (MAP KINASE KINASE 9); MAP kinase kinase/ kinase/ protein kinase activator	2.34412	0.0039
245777_at	AT1G73540	atnudt21 (Arabidopsis thaliana Nudix hydrolase homolog 21); hydrolase	3.04269	0.000606061
245840_at	AT1G58420	FUNCTIONS IN: molecular_function unknown; INVOLVED IN: biological_process unknown; LOCATED IN: cellular_component unknown; EXPRESSED IN: 21 plant structures; EXPRESSED DURING: 11 growth stages; CONTAINS InterPro DOMAIN/s: Uncharacterised conserved protein UCP031279 (InterPro:IPR016972); BEST Arabidopsis thaliana protein match is: unknown protein (TAIR:AT1G10140.1); Has 28 Blast hits to 28 protein…	1.84381	0.0147343
245866_s_at	AT1G57990;AT1G57980	[AT1G57990, ATPUP18; purine transmembrane transporter];[AT1G57980, purine permease-related]	1.88885	0.00939024
245906_at	AT5G11070	unknown protein	3.52221	0
245925_at	AT5G28770	BZO2H3; DNA binding / protein heterodimerization/ transcription factor	2.05394	0.00508929
246018_at	AT5G10695	unknown protein	1.8371	0.0155189
246034_at	AT5G08350	GRAM domain-containing protein / ABA-responsive protein-related	1.99799	0.0062963
246071_at	AT5G20150	SPX1 (SPX DOMAIN GENE 1)	1.79452	0.0088125
246099_at	AT5G20230	ATBCB (ARABIDOPSIS BLUE-COPPER-BINDING PROTEIN); copper ion binding / electron carrier	2.10998	0.00717241
246195_at	AT4G36410	UBC17 (UBIQUITIN-CONJUGATING ENZYME 17); small conjugating protein ligase/ ubiquitin-protein ligase	1.83104	0.00731544
246253_at	AT4G37260	MYB73 (MYB DOMAIN PROTEIN 73); DNA binding / transcription factor	2.48695	0.00283784
246270_at	AT4G36500	unknown protein	1.45968	0.0323279
246275_at	AT4G36540	BEE2 (BR Enhanced Expression 2); DNA binding / transcription factor	1.46642	0.0173543
246289_at	AT3G56880	VQ motif-containing protein	1.62768	0.0147596
246777_at	AT5G27420	zinc finger (C3HC4-type RING finger) family protein	1.69801	0.02392
246932_at	AT5G25190	ethylene-responsive element-binding protein, putative	1.40936	0.022915
247043_at	AT5G66880	SNRK2.3 (SUCROSE NONFERMENTING 1(SNF1)-RELATED PROTEIN KINASE 2.3); kinase/ protein kinase	1.16713	0.0446041
247047_at	AT5G66650	unknown protein	2.74014	0.00133333
247149_at	AT5G65660	hydroxyproline-rich glycoprotein family protein	1.32487	0.0291438
247177_at	AT5G65300	unknown protein	1.80353	0.0174208
247240_at	AT5G64660	U-box domain-containing protein	1.54928	0.0420783
247278_at	AT5G64380	fructose-1,6-bisphosphatase family protein	1.47269	0.0161644
247361_at	AT5G63480	unknown protein	1.46257	0.019569
247377_at	AT5G63180	pectate lyase family protein	1.54641	0.0141463
247393_at	AT5G63130	octicosapeptide/Phox/Bem1p (PB1) domain-containing protein	1.67891	0.0124623
247431_at	AT5G62520	SRO5 (SIMILAR TO RCD ONE 5); NAD+ ADP-ribosyltransferase	2.1416	0.0101149
247524_at	AT5G61440	ACHT5 (ATYPICAL CYS HIS RICH THIOREDOXIN 5)	3.19729	0.000384615
247540_at	AT5G61590	AP2 domain-containing transcription factor family protein	1.3382	0.0255814
247543_at	AT5G61600	ethylene-responsive element-binding family protein	2.89588	0.000666667
247585_at	AT5G60680	unknown protein	2.3099	0.00376344
247655_at	AT5G59820	RHL41 (RESPONSIVE TO HIGH LIGHT 41); nucleic acid binding / transcription factor/ zinc ion binding	2.80503	0.000588235
247693_at	AT5G59730	ATEXO70H7 (EXOCYST SUBUNIT EXO70 FAMILY PROTEIN H7); protein binding	1.45758	0.024502
247708_at	AT5G59550	zinc finger (C3HC4-type RING finger) family protein	3.12525	0.000344828
247726_at	AT5G59430	TRP1 (TELOMERIC REPEAT BINDING PROTEIN 1); DNA binding / double-stranded telomeric DNA binding	1.78029	0.00821192
247754_at	AT5G59080	unknown protein	2.43111	0.00164179
247811_at	AT5G58430	ATEXO70B1 (exocyst subunit EXO70 family protein B1); protein binding	1.47242	0.0265314
247903_at	AT5G57340	unknown protein	1.1539	0.0404908
248140_at	AT5G54980	integral membrane family protein	1.17781	0.042806
248163_at	AT5G54510	DFL1 (DWARF IN LIGHT 1); indole-3-acetic acid amido synthetase	1.63256	0.010452
248164_at	AT5G54490	PBP1 (PINOID-BINDING PROTEIN 1); calcium ion binding / protein binding	2.58607	0.00276316
248177_at	AT5G54630	zinc finger protein-related	1.12837	0.0488889
248270_at	AT5G53450	ORG1 (OBP3-responsive gene 1); ATP binding / kinase/ protein kinase	1.4517	0.021822
248282_at	AT5G52900	unknown protein	1.29641	0.0267391
248392_at	AT5G52050	MATE efflux protein-related	2.71968	0.00140351
248432_at	AT5G51390	unknown protein	2.06934	0.00571429
248448_at	AT5G51190	AP2 domain-containing transcription factor, putative	3.10583	0.000625
248606_at	AT5G49450;AT5G49448	[AT5G49450, AtbZIP1 (Arabidopsis thaliana basic leucine-zipper 1); DNA binding / protein heterodimerization/ transcription factor];[AT5G49448, CPuORF4 (Conserved peptide upstream open reading frame 4)]	2.3663	0.00392857
248683_at	AT5G48490	protease inhibitor/seed storage/lipid transfer protein (LTP) family protein	1.30824	0.0255513
248793_at	AT5G47240	atnudt8 (Arabidopsis thaliana Nudix hydrolase homolog 8); hydrolase	2.49889	0.00161765
248794_at	AT5G47220	ERF2 (ETHYLENE RESPONSIVE ELEMENT BINDING FACTOR 2); DNA binding / transcription activator/ transcription factor	2.60598	0.00265823
248795_at	AT5G47390	myb family transcription factor	1.60406	0.0110695
248799_at	AT5G47230	ERF5 (ETHYLENE RESPONSIVE ELEMENT BINDING FACTOR 5); DNA binding / transcription activator/ transcription factor	3.30269	0.000434783
248801_at	AT5G47370	HAT2; DNA binding / transcription factor/ transcription repressor	1.16164	0.0378816
248821_at	AT5G47070	protein kinase, putative	2.40466	0.00406977
248870_at	AT5G46710	zinc-binding family protein	2.67186	0.00135593
248959_at	AT5G45630	unknown protein	2.24544	0.00626866
248961_at	AT5G45650	subtilase family protein	1.93839	0.0057265
248964_at	AT5G45340	CYP707A3; (+)-abscisic acid 8'-hydroxylase/ oxygen binding	3.30362	0.000416667
248981_at	AT5G45110	NPR3 (NPR1-LIKE PROTEIN 3); protein binding	1.3985	0.0287241
249008_at	AT5G44680	methyladenine glycosylase family protein	1.45246	0.0157477
249197_at	AT5G42380	CML37 (CALMODULIN LIKE 37); calcium ion binding	2.45792	0.00578512
249276_at	AT5G41880	POLA3; DNA primase	1.1089	0.0448538
249337_at	AT5G41080	glycerophosphoryl diester phosphodiesterase family protein	2.79465	0.000612245
249522_at	AT5G38700	unknown protein	2.27551	0.00727273
249694_at	AT5G35790	G6PD1 (GLUCOSE-6-PHOSPHATE DEHYDROGENASE 1); glucose-6-phosphate dehydrogenase	1.4804	0.0158986
249719_at	AT5G35735	auxin-responsive family protein	1.9258	0.010663
249746_at	AT5G24590	TIP (TCV-INTERACTING PROTEIN); transcription coactivator/ transcription factor	1.53925	0.0302349
249862_at	AT5G22920	zinc finger (C3HC4-type RING finger) family protein	3.49951	0
249922_at	AT5G19140	AILP1	1.61739	0.010765
249923_at	AT5G19120	aspartic-type endopeptidase	1.59824	0.0111856
249928_at	AT5G22250	CCR4-NOT transcription complex protein, putative	3.02415	0.000571429
250008_at	AT5G18630	lipase class 3 family protein	1.93982	0.00566929
250028_at	AT5G18130	unknown protein	1.45058	0.02173
250098_at	AT5G17350	unknown protein	2.61137	0.0015625
250232_at	AT5G13950	unknown protein	1.07401	0.0496893
250268_s_at	AT5G12950;AT5G12960	[AT5G12950, catalytic];[AT5G12960, catalytic]	1.27394	0.0287456
250524_at	AT5G08520	myb family transcription factor	1.20626	0.0315894
250669_at	AT5G06870	PGIP2 (POLYGALACTURONASE INHIBITING PROTEIN 2); protein binding	1.60017	0.0226939
250676_at	AT5G06320	NHL3	2.31854	0.00395833
250753_at	AT5G05860	UGT76C2; UDP-glycosyltransferase/ cis-zeatin O-beta-D-glucosyltransferase/ cytokinin 7-beta-glucosyltransferase/ cytokinin 9-beta-glucosyltransferase/ trans-zeatin O-beta-D-glucosyltransferase/ transferase, transferring glycosyl groups	1.18507	0.0351923
250781_at	AT5G05410	DREB2A; DNA binding / transcription activator/ transcription factor	2.58719	0.00239437
250842_at	AT5G04490	VTE5 (vitamin E pathway gene5); phosphatidate cytidylyltransferase/ phytol kinase	1.26077	0.0287762
251017_at	AT5G02760	protein phosphatase 2C family protein / PP2C family protein	1.30282	0.0293559
251169_at	AT3G63210	MARD1	1.10494	0.0448688
251196_at	AT3G62950	glutaredoxin family protein	3.18107	0.0004
251219_at	AT3G62390	unknown protein	1.22802	0.0321782
251221_at	AT3G62550	universal stress protein (USP) family protein	3.07614	0.000588235
251259_at	AT3G62260	protein phosphatase 2C, putative / PP2C, putative	1.5066	0.0352581
251336_at	AT3G61190	BAP1 (BON ASSOCIATION PROTEIN 1); phospholipid binding / protein binding	3.68636	0
251356_at	AT3G61060	AtPP2-A13 (Arabidopsis thaliana phloem protein 2-A13); carbohydrate binding	2.10796	0.00526316
251443_at	AT3G59940	kelch repeat-containing F-box family protein	1.66597	0.00982143
251476_at	AT3G59670	unknown protein	1.15508	0.0390093
251593_at	AT3G57660	NRPA1; DNA binding / DNA-directed RNA polymerase/ zinc ion binding	1.26853	0.0265038
251705_at	AT3G56400	WRKY70; transcription factor/ transcription repressor	2.1081	0.00652174
251745_at	AT3G55980	SZF1 (SALT-INDUCIBLE ZINC FINGER 1); transcription factor	2.71213	0.00127273
251774_at	AT3G55840	FUNCTIONS IN: molecular_function unknown; INVOLVED IN: biological_process unknown; LOCATED IN: cellular_component unknown; EXPRESSED IN: 10 plant structures; EXPRESSED DURING: 6 growth stages; CONTAINS InterPro DOMAIN/s: Hs1pro-1, C-terminal (InterPro:IPR009743), Hs1pro-1, N-terminal (InterPro:IPR009869); BEST Arabidopsis thaliana protein match is: HSPRO2 (ARABIDOPSIS ORTHOLOG OF SUGAR BEET HS1 P…	1.75348	0.0245059
251856_at	AT3G54720	AMP1 (ALTERED MERISTEM PROGRAM 1); carboxypeptidase/ dipeptidase	1.15525	0.038354
252036_at	AT3G52070	unknown protein	1.8922	0.00847134
252045_at	AT3G52450	PUB22 (PLANT U-BOX 22); ubiquitin-protein ligase	2.13045	0.00886792
252131_at	AT3G50930	BCS1 (CYTOCHROME BC1 SYNTHESIS); ATP binding / ATPase/ nucleoside-triphosphatase/ nucleotide binding	2.14325	0.00620438
252193_at	AT3G50060	MYB77; DNA binding / transcription factor	2.3225	0.00368421
252199_at	AT3G50270	transferase family protein	1.25037	0.0311
252278_at	AT3G49530	anac062 (Arabidopsis NAC domain containing protein 62); transcription factor	1.92231	0.0100578
252317_at	AT3G48720	transferase family protein	1.39654	0.0199574
252367_at	AT3G48360	BT2 (BTB AND TAZ DOMAIN PROTEIN 2); protein binding / transcription factor/ transcription regulator	2.91626	0.000714286
252368_at	AT3G48520	CYP94B3; electron carrier/ heme binding / iron ion binding / monooxygenase/ oxygen binding	2.36232	0.00618321
252464_at	AT3G47160	protein binding / zinc ion binding	1.7715	0.0103933
252474_at	AT3G46620	zinc finger (C3HC4-type RING finger) family protein	2.4757	0.00259259
252483_at	AT3G46600	scarecrow transcription factor family protein	2.35693	0.00380435
252504_at	AT3G46590	TRFL1 (TRF-LIKE 1); DNA bending/ DNA binding / telomeric DNA binding	1.43157	0.0182819
252557_at	AT3G45960	ATEXLA3 (arabidopsis thaliana expansin-like a3)	2.18491	0.00850649
252607_at	AT3G44990	XTR8 (XYLOGLUCAN ENDO-TRANSGLYCOSYLASE-RELATED 8); hydrolase, acting on glycosyl bonds / xyloglucan:xyloglucosyl transferase	1.67012	0.0091411
252679_at	AT3G44260	CCR4-NOT transcription complex protein, putative	2.54285	0.00232877
252831_at	AT4G39980	DHS1 (3-DEOXY-D-ARABINO-HEPTULOSONATE 7-PHOSPHATE SYNTHASE 1); 3-deoxy-7-phosphoheptulonate synthase	1.24891	0.0283871
252858_at	AT4G39770	trehalose-6-phosphate phosphatase, putative	1.84531	0.00625
253061_at	AT4G37610	BT5 (BTB AND TAZ DOMAIN PROTEIN 5); protein binding / transcription regulator	2.86409	0.000638298
253125_at	AT4G36040	DNAJ heat shock N-terminal domain-containing protein (J11)	1.69639	0.0106145
253259_at	AT4G34410	RRTF1 ({REDOX RESPONSIVE TRANSCRIPTION FACTOR 1); DNA binding / transcription factor	5.15884	0
253305_at	AT4G33666	unknown protein	1.8722	0.00722222
253643_at	AT4G29780	unknown protein	4.2605	0
253722_at	AT4G29190	zinc finger (CCCH-type) family protein	1.51614	0.0132353
253830_at	AT4G27652	unknown protein	2.13937	0.00522124
253832_at	AT4G27654	unknown protein	3.5571	0
253859_at	AT4G27657	unknown protein	1.72322	0.0112821
253865_at	AT4G27470	zinc finger (C3HC4-type RING finger) family protein	2.02478	0.00569106
253872_at	AT4G27410	RD26 (RESPONSIVE TO DESICCATION 26); transcription activator/ transcription factor	1.78095	0.00976331
253874_at	AT4G27450	unknown protein	1.82624	0.00851613
253880_at	AT4G27590	copper-binding protein-related	1.44662	0.0182895
253886_at	AT4G27710	CYP709B3; electron carrier/ heme binding / iron ion binding / monooxygenase/ oxygen binding	1.18025	0.036519
253915_at	AT4G27280	calcium-binding EF hand family protein	1.44003	0.0264964
254074_at	AT4G25490	CBF1 (C-REPEAT/DRE BINDING FACTOR 1); DNA binding / transcription activator/ transcription factor	3.69126	0
254075_at	AT4G25470	CBF2 (C-REPEAT/DRE BINDING FACTOR 2); DNA binding / transcription activator/ transcription factor	3.81193	0
254089_at	AT4G24800	MA3 domain-containing protein	1.16758	0.0365079
254120_at	AT4G24570	mitochondrial substrate carrier family protein	3.08768	0.000645161
254158_at	AT4G24380	unknown protein	2.64895	0.00145161
254232_at	AT4G23600	CORI3 (CORONATINE INDUCED 1); cystathionine beta-lyase/ transaminase	1.45849	0.0254687
254293_at	AT4G23060	IQD22 (IQ-domain 22); calmodulin binding	1.16447	0.0489205
254424_at	AT4G21510	F-box family protein	1.15276	0.0460231
254522_at	AT4G19980	unknown protein	1.42683	0.0266296
254564_at	AT4G19170	NCED4 (NINE-CIS-EPOXYCAROTENOID DIOXYGENASE 4)	1.50749	0.0129064
254592_at	AT4G18880	AT-HSFA4A; DNA binding / transcription factor	1.98861	0.00664286
254665_at	AT4G18340	glycosyl hydrolase family 17 protein	2.52109	0.00236111
254688_at	AT4G13830	J20 (DNAJ-LIKE 20); heat shock protein binding	1.94033	0.00578125
254926_at	AT4G11280	ACS6 (1-AMINOCYCLOPROPANE-1-CARBOXYLIC ACID (ACC) SYNTHASE 6); 1-aminocyclopropane-1-carboxylate synthase	3.25915	0.000454545
254931_at	AT4G11460	protein kinase family protein	1.45754	0.0285563
254954_at	AT4G10910	unknown protein	1.68706	0.0111518
255068_at	AT4G08920	CRY1 (CRYPTOCHROME 1); ATP binding / blue light photoreceptor/ protein homodimerization/ protein kinase	1.13741	0.0417576
255255_at	AT4G05070	unknown protein	1.31322	0.0364353
255381_at	AT4G03510	RMA1; protein binding / ubiquitin-protein ligase/ zinc ion binding	2.71058	0.00142857
255568_at	AT4G01250	WRKY22; transcription factor	2.26801	0.00573643
255579_at	AT4G01460	basic helix-loop-helix (bHLH) family protein	1.1274	0.0435015
255733_at	AT1G25400	unknown protein	3.54764	0
255734_at	AT1G25550	myb family transcription factor	1.62547	0.0122222
255742_at	AT1G25560	TEM1 (TEMPRANILLO 1); transcription factor	1.67407	0.00988024
255844_at	AT2G33580	protein kinase family protein / peptidoglycan-binding LysM domain-containing protein	2.25857	0.00495495
255937_at	AT1G12610	DDF1 (DWARF AND DELAYED FLOWERING 1); DNA binding / sequence-specific DNA binding / transcription factor	2.28569	0.00623077
255945_at	AT5G28610	FUNCTIONS IN: molecular_function unknown; INVOLVED IN: biological_process unknown; LOCATED IN: cellular_component unknown; EXPRESSED IN: stem, hypocotyl, root, seed, leaf; EXPRESSED DURING: E expanded cotyledon stage, LP.12 twelve leaves visible; BEST Arabidopsis thaliana protein match is: glycine-rich protein (TAIR:AT5G28630.1); Has 1909 Blast hits to 1356 proteins in 121 species: Archae - 0; Ba…	1.44234	0.0346429
256009_at	AT1G19210	AP2 domain-containing transcription factor, putative	4.26764	0
256017_at	AT1G19180	JAZ1 (JASMONATE-ZIM-DOMAIN PROTEIN 1); protein binding	2.04592	0.0101163
256096_at	AT1G13650	FUNCTIONS IN: molecular_function unknown; INVOLVED IN: biological_process unknown; LOCATED IN: cellular_component unknown; EXPRESSED IN: 15 plant structures; EXPRESSED DURING: 6 growth stages; BEST Arabidopsis thaliana protein match is: 18S pre-ribosomal assembly protein gar2-related (TAIR:AT2G03810.4); Has 3725 Blast hits to 1574 proteins in 203 species: Archae - 2; Bacteria - 168; Metazoa - 816…	1.56244	0.0109783
256098_at	AT1G13700	glucosamine/galactosamine-6-phosphate isomerase family protein	2.31038	0.004
256159_at	AT1G30135	JAZ8 (JASMONATE-ZIM-DOMAIN PROTEIN 8)	1.68937	0.0447384
256225_at	AT1G56220	dormancy/auxin associated family protein	1.4413	0.0247244
256262_at	AT3G12150	unknown protein	1.29785	0.0267286
256300_at	AT1G69490	NAP (NAC-like, activated by AP3/PI); transcription factor	2.41507	0.0037234
256356_s_at	AT5G43620;AT1G66500	[AT5G43620, S-locus protein-related];[AT1G66500, zinc finger (C2H2-type) family protein]	1.8719	0.00673759
256433_at	AT3G10985	SAG20 (SENESCENCE ASSOCIATED GENE 20)	1.37736	0.0257471
256442_at	AT3G10930	unknown protein	3.45755	0
256522_at	AT1G66160	U-box domain-containing protein	2.38083	0.00397959
256526_at	AT1G66090	disease resistance protein (TIR-NBS class), putative	1.9534	0.0130348
256633_at	AT3G28340	GATL10 (Galacturonosyltransferase-like 10); polygalacturonate 4-alpha-galacturonosyltransferase/ transferase, transferring hexosyl groups	2.4909	0.00384615
256818_at	AT3G21420	oxidoreductase, 2OG-Fe(II) oxygenase family protein	1.23389	0.0302694
256914_at	AT3G23880	F-box family protein	1.50814	0.0190435
257022_at	AT3G19580	AZF2 (ARABIDOPSIS ZINC-FINGER PROTEIN 2); DNA binding / nucleic acid binding / transcription factor/ transcription repressor/ zinc ion binding	2.70672	0.0012963
257026_at	AT3G19200	unknown protein	1.40071	0.0301014
257029_at	AT3G19240	FUNCTIONS IN: molecular_function unknown; INVOLVED IN: N-terminal protein myristoylation; LOCATED IN: cellular_component unknown; EXPRESSED IN: 25 plant structures; EXPRESSED DURING: 15 growth stages; CONTAINS InterPro DOMAIN/s: WD40 repeat-like (InterPro:IPR011046), Vacuolar import and degradation, Vid27-related (InterPro:IPR013863); BEST Arabidopsis thaliana protein match is: dem protein-relate…	1.38727	0.035209
257053_at	AT3G15210	ERF4 (ETHYLENE RESPONSIVE ELEMENT BINDING FACTOR 4); DNA binding / protein binding / transcription factor/ transcription repressor	2.19781	0.00444444
257062_at	AT3G18290	EMB2454 (embryo defective 2454); protein binding / zinc ion binding	1.17712	0.0467816
257083_s_at	AT3G20590;AT3G20600	[AT3G20590, non-race specific disease resistance protein, putative];[AT3G20600, NDR1 (non race-specific disease resistance 1); signal transducer]	1.64594	0.0284561
257154_at	AT3G27210	unknown protein	2.23568	0.00588235
257294_at	AT3G15570	phototropic-responsive NPH3 family protein	2.03594	0.00423077
257315_at	AT3G30775	ERD5 (EARLY RESPONSIVE TO DEHYDRATION 5); proline dehydrogenase	1.76172	0.0111111
257407_at	AT1G27100	FUNCTIONS IN: molecular_function unknown; INVOLVED IN: biological_process unknown; LOCATED IN: vacuole; EXPRESSED IN: 23 plant structures; EXPRESSED DURING: 13 growth stages; CONTAINS InterPro DOMAIN/s: Protein of unknown function DUF569 (InterPro:IPR007679), Actin_cross-linking (InterPro:IPR008999); BEST Arabidopsis thaliana protein match is: unknown protein (TAIR:AT1G69900.1); Has 184 Blast hit…	1.55205	0.0157277
257504_at	AT1G52240	ROPGEF11 (RHO GUANYL-NUCLEOTIDE EXCHANGE FACTOR 11); Rho guanyl-nucleotide exchange factor	1.74697	0.0264338
257516_at	AT1G69040	ACR4 (ACT REPEAT 4); amino acid binding	1.31413	0.0345928
257690_at	AT3G12830	auxin-responsive family protein	1.9601	0.00835526
257772_at	AT3G23080	FUNCTIONS IN: molecular_function unknown; INVOLVED IN: biological_process unknown; EXPRESSED IN: 23 plant structures; EXPRESSED DURING: 13 growth stages; CONTAINS InterPro DOMAIN/s: Lipid-binding START (InterPro:IPR002913); BEST Arabidopsis thaliana protein match is: unknown protein (TAIR:AT4G14500.1); Has 247 Blast hits to 246 proteins in 61 species: Archae - 0; Bacteria - 0; Metazoa - 162; Fung…	1.99692	0.0057377
257832_at	AT3G26740	CCL (CCR-LIKE)	1.35147	0.0364217
257866_at	AT3G17770	dihydroxyacetone kinase family protein	1.22417	0.0304013
257919_at	AT3G23250	MYB15 (MYB DOMAIN PROTEIN 15); DNA binding / transcription factor	2.90104	0.000625
257964_at	AT3G19850	phototropic-responsive NPH3 family protein	1.50238	0.0191342
257999_at	AT3G27540	glycosyl transferase family 17 protein	1.24471	0.0496338
258207_at	AT3G14050	RSH2 (RELA-SPOT HOMOLOG 2); GTP diphosphokinase	1.7344	0.00736486
258225_at	AT3G15630	unknown protein	2.33264	0.00425743
258402_at	AT3G15450	unknown protein	2.2323	0.00419048
258436_at	AT3G16720	ATL2; protein binding / zinc ion binding	1.46819	0.0222727
258505_at	AT3G06530	binding	1.16614	0.0377743
258507_at	AT3G06500	beta-fructofuranosidase, putative / invertase, putative / saccharase, putative / beta-fructosidase, putative	1.586	0.0228862
258606_at	AT3G02840	immediate-early fungal elicitor family protein	4.43571	0
258792_at	AT3G04640	glycine-rich protein	3.08304	0.000540541
258856_at	AT3G02040	SRG3 (senescence-related gene 3); glycerophosphodiester phosphodiesterase/ phosphoric diester hydrolase	1.48523	0.0199145
258947_at	AT3G01830	calmodulin-related protein, putative	2.28181	0.015787
259015_at	AT3G07350	unknown protein	1.97063	0.00613636
259017_at	AT3G07310	unknown protein	1.94897	0.00472727
259340_at	AT3G03870	unknown protein	1.08554	0.0488286
259364_at	AT1G13260	RAV1; DNA binding / transcription factor/ transcription repressor	2.49806	0.0028
259365_at	AT1G13300	myb family transcription factor	1.50088	0.0239759
259426_at	AT1G01470	LEA14 (LATE EMBRYOGENESIS ABUNDANT 14)	1.42428	0.022541
259441_at	AT1G02300	cathepsin B-like cysteine protease, putative	1.14815	0.0430357
259685_at	AT1G63090	AtPP2-A11 (Phloem protein 2-A11); carbohydrate binding	1.32516	0.0267041
259729_at	AT1G77640	AP2 domain-containing transcription factor, putative	1.90595	0.0173661
259741_at	AT1G71020	armadillo/beta-catenin repeat family protein / U-box domain-containing protein	1.12793	0.044
259751_at	AT1G71030	MYBL2 (ARABIDOPSIS MYB-LIKE 2); DNA binding / transcription factor	2.03184	0.00556522
259842_at	AT1G73602;AT1G73600	[AT1G73602, CPuORF32 (Conserved peptide upstream open reading frame 32)];[AT1G73600, methyltransferase/ phosphoethanolamine N-methyltransferase]	1.79966	0.0062406
259866_at	AT1G76640	calmodulin-related protein, putative	1.75407	0.0266182
259879_at	AT1G76650	calcium-binding EF hand family protein	3.86552	0
259979_at	AT1G76600	unknown protein	3.0207	0.000769231
259982_at	AT1G76410	ATL8; protein binding / zinc ion binding	2.81772	0.0006
259996_at	AT1G67910	unknown protein	1.59088	0.0148325
260037_at	AT1G68840	RAV2 (REGULATOR OF THE ATPASE OF THE VACUOLAR MEMBRANE); DNA binding / transcription factor/ transcription repressor	1.97285	0.00564516
260048_at	AT1G73750	EXPRESSED IN: 22 plant structures; EXPRESSED DURING: 13 growth stages; CONTAINS InterPro DOMAIN/s: Uncharacterised conserved protein UCP031088, alpha/beta hydrolase, At1g15070 (InterPro:IPR016969); BEST Arabidopsis thaliana protein match is: unknown protein (TAIR:AT1G15060.1); Has 121 Blast hits to 101 proteins in 28 species: Archae - 0; Bacteria - 44; Metazoa - 8; Fungi - 0; Plants - 61; Viruses…	1.28632	0.0255598
260070_at	AT1G73830	BEE3 (BR ENHANCED EXPRESSION 3); DNA binding / transcription factor	1.59399	0.0110881
260227_at	AT1G74450	unknown protein	2.44223	0.002625
260266_at	AT1G68520	zinc finger (B-box type) family protein	1.87147	0.00576
260287_at	AT1G80440	kelch repeat-containing F-box family protein	2.52228	0.00153846
260411_at	AT1G69890	FUNCTIONS IN: molecular_function unknown; INVOLVED IN: biological_process unknown; EXPRESSED IN: 21 plant structures; EXPRESSED DURING: 13 growth stages; CONTAINS InterPro DOMAIN/s: Protein of unknown function DUF569 (InterPro:IPR007679), Actin_cross-linking (InterPro:IPR008999); BEST Arabidopsis thaliana protein match is: unknown protein (TAIR:AT1G27100.1); Has 121 Blast hits to 109 proteins in …	2.65309	0.00142857
260431_at	AT1G68190	zinc finger (B-box type) family protein	2.28971	0.00402299
260656_at	AT1G19380	unknown protein	1.7538	0.0182667
260717_at	AT1G48120	calcineurin-like phosphoesterase family protein	1.13849	0.0396914
260741_at	AT1G15040	glutamine amidotransferase-related	1.77089	0.0256489
260744_at	AT1G15010	unknown protein	4.60475	0
260856_at	AT1G21910	AP2 domain-containing transcription factor family protein	1.55927	0.0288542
260915_at	AT1G02660	lipase class 3 family protein	3.18597	0.000357143
261033_at	AT1G17380	JAZ5 (JASMONATE-ZIM-DOMAIN PROTEIN 5)	1.91071	0.0154286
261037_at	AT1G17420	LOX3; electron carrier/ iron ion binding / lipoxygenase/ metal ion binding / oxidoreductase, acting on single donors with incorporation of molecular oxygen, incorporation of two atoms of oxygen	1.61077	0.0407295
261075_at	AT1G07280	binding	1.15022	0.0403692
261118_at	AT1G75460	ATP-dependent protease La (LON) domain-containing protein	1.66268	0.0107222
261143_at	AT1G19770	ATPUP14; purine transmembrane transporter	2.62676	0.00137931
261193_at	AT1G32920	unknown protein	1.72764	0.0121827
261405_at	AT1G18740	unknown protein	2.28203	0.00393258
261470_at	AT1G28370	ERF11 (ERF DOMAIN PROTEIN 11); DNA binding / transcription factor/ transcription repressor	3.02298	0.000731707
261476_at	AT1G14480	protein binding	1.62776	0.0143689
261567_at	AT1G33055	unknown protein	1.74655	0.0129703
261648_at	AT1G27730	STZ (salt tolerance zinc finger); nucleic acid binding / transcription factor/ transcription repressor/ zinc ion binding	3.21008	0.00037037
261711_at	AT1G32700	zinc-binding family protein	1.29083	0.0289691
261713_at	AT1G32640	MYC2; DNA binding / transcription activator/ transcription factor	1.71603	0.011027
261768_at	AT1G15550	GA3OX1 (GIBBERELLIN 3-OXIDASE 1); gibberellin 3-beta-dioxygenase/ transcription factor binding	2.04212	0.0045283
261801_at	AT1G30520	AAE14 (Acyl-Activating Enzyme 14); AMP binding / o-succinylbenzoate-CoA ligase	1.10466	0.0476218
261892_at	AT1G80840	WRKY40; transcription factor	5.16874	0
261901_at	AT1G80920	J8; heat shock protein binding / unfolded protein binding	1.64344	0.0157674
261956_at	AT1G64590	short-chain dehydrogenase/reductase (SDR) family protein	1.52565	0.0168182
261984_at	AT1G33760	AP2 domain-containing transcription factor, putative	2.06294	0.0196137
262072_at	AT1G59590	ZCF37	1.47684	0.0404587
262092_at	AT1G56150	auxin-responsive family protein	1.21382	0.0460405
262170_at	AT1G74940	senescence-associated protein-related	1.64527	0.00901235
262211_at	AT1G74930	ORA47; DNA binding / transcription factor	5.81552	0
262226_at	AT1G53903;AT1G53885	[AT1G53903, CONTAINS InterPro DOMAIN/s: Protein of unknown function DUF581 (InterPro:IPR007650); BEST Arabidopsis thaliana protein match is: senescence-associated protein-related (TAIR:AT1G53885.1); Has 277 Blast hits to 277 proteins in 14 species: Archae - 0; Bacteria - 0; Metazoa - 0; Fungi - 0; Plants - 277; Viruses - 0; Other Eukaryotes - 0 (source: NCBI BLink).];[AT1G53885, senescence-associ…	1.83391	0.0105114
262331_at	AT1G64050	unknown protein	1.29574	0.0255682
262355_at	AT1G72820	mitochondrial substrate carrier family protein	1.63485	0.0108242
262366_at	AT1G72890	disease resistance protein (TIR-NBS class), putative	1.37661	0.0220833
262382_at	AT1G72920	disease resistance protein (TIR-NBS class), putative	2.97793	0.000652174
262383_at	AT1G72940	disease resistance protein (TIR-NBS class), putative	1.37123	0.0280935
262399_at	AT1G49500	unknown protein	1.59781	0.0120918
262411_at	AT1G34640	unknown protein	1.27224	0.0283986
262986_at	AT1G23390	kelch repeat-containing F-box family protein	2.41979	0.00147541
263014_at	AT1G23400	CAF2; RNA splicing factor, transesterification mechanism	1.11981	0.0434615
263182_at	AT1G05575	unknown protein	3.01121	0.000681818
263265_at	AT2G38820	unknown protein	1.6443	0.0110215
263325_at	AT2G04240	XERICO; protein binding / zinc ion binding	1.21677	0.0312625
263379_at	AT2G40140	CZF1; transcription factor	2.20663	0.00583333
263475_at	AT2G31945	unknown protein	1.96195	0.0096988
263478_at	AT2G31880	leucine-rich repeat transmembrane protein kinase, putative	1.5312	0.0283333
263613_at	AT2G25250	unknown protein	2.09819	0.00584746
263783_at	AT2G46400	WRKY46; transcription factor	2.32851	0.00813333
263799_at	AT2G24550	unknown protein	2.50871	0.00242857
263931_at	AT2G36220	unknown protein	2.04183	0.00879747
263935_at	AT2G35930	PUB23 (PLANT U-BOX 23); ubiquitin-protein ligase	2.37041	0.00421569
263953_at	AT2G36050	OFP15 (ARABIDOPSIS THALIANA OVATE FAMILY PROTEIN 15)	1.11676	0.0451594
263972_at	AT2G42760	unknown protein	1.99196	0.00727891
263981_at	AT2G42870	PAR1 (PHY RAPIDLY REGULATED 1)	1.33535	0.03775
264000_at	AT2G22500	UCP5 (UNCOUPLING PROTEIN 5); binding	1.56344	0.0263736
264217_at	AT1G60190	armadillo/beta-catenin repeat family protein / U-box domain-containing protein	1.96565	0.0225514
264240_at	AT1G54820	protein kinase family protein	1.64951	0.00982353
264314_at	AT1G70420	unknown protein	1.33527	0.0434218
264339_at	AT1G70290	ATTPS8; alpha,alpha-trehalose-phosphate synthase (UDP-forming)/ transferase, transferring glycosyl groups / trehalose-phosphatase	2.43626	0.00173913
264379_at	AT2G25200	unknown protein	2.30214	0.00329268
264445_at	AT1G27290	unknown protein	1.48256	0.0217227
264463_at	AT1G10150	carbohydrate binding	1.3125	0.026566
264467_at	AT1G10140	FUNCTIONS IN: molecular_function unknown; INVOLVED IN: biological_process unknown; LOCATED IN: plasma membrane; EXPRESSED IN: 23 plant structures; EXPRESSED DURING: 13 growth stages; CONTAINS InterPro DOMAIN/s: Uncharacterised conserved protein UCP031279 (InterPro:IPR016972); BEST Arabidopsis thaliana protein match is: unknown protein (TAIR:AT1G58420.1); Has 38 Blast hits to 38 proteins in 10 spe…	1.54645	0.0182301
264529_at	AT1G30820	CTP synthase, putative / UTP--ammonia ligase, putative	2.22922	0.00440367
264758_at	AT1G61340	F-box family protein	3.20374	0.000333333
264787_at	AT2G17840	ERD7 (EARLY-RESPONSIVE TO DEHYDRATION 7)	1.62993	0.0189956
264788_at	AT2G17880	DNAJ heat shock protein, putative	3.6683	0
264854_at	AT2G17450	RHA3A; protein binding / zinc ion binding	1.5422	0.0161468
264942_at	AT1G67340	zinc finger (MYND type) family protein / F-box family protein	1.17848	0.0368868
265067_at	AT1G03850	glutaredoxin family protein	2.06317	0.00577586
265184_at	AT1G23710	unknown protein	2.90414	0.000697674
265248_at	AT2G43010	PIF4 (phytochrome interacting factor 4); DNA binding / protein binding / transcription factor	1.5263	0.0111458
265276_at	AT2G28400	unknown protein	1.69228	0.0223237
265327_at	AT2G18210	unknown protein	1.96772	0.0173874
265342_at	AT2G18300	basic helix-loop-helix (bHLH) family protein	1.62747	0.0102286
265387_at	AT2G20670	unknown protein	2.43079	0.00151515
265457_at	AT2G46550	unknown protein	1.54217	0.0154028
265478_at	AT2G15890	MEE14 (maternal effect embryo arrest 14)	1.55789	0.0254086
265584_at	AT2G20180	PIL5 (PHYTOCHROME INTERACTING FACTOR 3-LIKE 5); DNA binding / phytochrome binding / transcription factor	1.58145	0.00988304
265680_at	AT2G32150	haloacid dehalogenase-like hydrolase family protein	2.27788	0.00393939
265724_at	AT2G32100	OFP16 (ARABIDOPSIS THALIANA OVATE FAMILY PROTEIN 16)	2.00611	0.00388889
265732_at	AT2G01300	unknown protein	1.49566	0.0246667
265872_at	AT2G01670	atnudt17 (Arabidopsis thaliana Nudix hydrolase homolog 17); hydrolase	1.32748	0.0287889
265884_at	AT2G42320	nucleolar protein gar2-related	1.81412	0.00712329
265918_at	AT2G15090	KCS8 (3-KETOACYL-COA SYNTHASE 8); acyltransferase/ catalytic/ transferase, transferring acyl groups other than amino-acyl groups	1.30882	0.0244444
265962_at	AT2G37460	nodulin MtN21 family protein	1.53935	0.0124
266072_at	AT2G18700	ATTPS11; transferase, transferring glycosyl groups	1.88032	0.00852564
266106_at	AT2G45170	AtATG8e; microtubule binding	1.32733	0.0422823
266259_at	AT2G27830	FUNCTIONS IN: molecular_function unknown; EXPRESSED IN: 22 plant structures; EXPRESSED DURING: 13 growth stages; BEST Arabidopsis thaliana protein match is: pentatricopeptide (PPR) repeat-containing protein (TAIR:AT4G22760.1); Has 68 Blast hits to 68 proteins in 11 species: Archae - 0; Bacteria - 0; Metazoa - 0; Fungi - 0; Plants - 68; Viruses - 0; Other Eukaryotes - 0 (source: NCBI BLink).	1.44635	0.0256154
266278_at	AT2G29300	tropinone reductase, putative / tropine dehydrogenase, putative	1.3379	0.0277256
266279_at	AT2G29290	tropinone reductase, putative / tropine dehydrogenase, putative	1.29794	0.0282857
266316_at	AT2G27080	harpin-induced protein-related / HIN1-related / harpin-responsive protein-related	2.04424	0.0071831
266396_at	AT2G38790	unknown protein	1.55019	0.0290816
266617_at	AT2G29670	binding	2.2822	0.00269231
266656_at	AT2G25900	ATCTH; transcription factor	2.78941	0.00075
266658_at	AT2G25735	unknown protein	3.06641	0.000789474
266707_at	AT2G03310	unknown protein	1.5536	0.0110526
266799_at	AT2G22860	ATPSK2 (PHYTOSULFOKINE 2 PRECURSOR); growth factor	1.76552	0.0216318
266800_at	AT2G22880	VQ motif-containing protein	3.46407	0
266821_at	AT2G44840	ERF13 (ETHYLENE-RESPONSIVE ELEMENT BINDING FACTOR 13); DNA binding / transcription factor	2.85476	0.000576923
266832_at	AT2G30040	MAPKKK14; ATP binding / kinase/ protein kinase/ protein serine/threonine kinase	3.0767	0.000555556
266834_s_at	AT3G27140;AT4G08260;AT2G30020	[AT3G27140, protein phosphatase 2C, putative / PP2C, putative];[AT4G08260, protein phosphatase 2C, putative / PP2C, putative];[AT2G30020, protein phosphatase 2C, putative / PP2C, putative]	3.7216	0
266899_at	AT2G34620	mitochondrial transcription termination factor-related / mTERF-related	2.10654	0.00427184
266901_at	AT2G34600	JAZ7 (JASMONATE-ZIM-DOMAIN PROTEIN 7)	3.5367	0
267028_at	AT2G38470	WRKY33; transcription factor	2.40999	0.00402062
267069_at	AT2G41010	ATCAMBP25 (ARABIDOPSIS THALIANA CALMODULIN (CAM)-BINDING PROTEIN OF 25 KDA); calmodulin binding	1.88019	0.0089441
267084_at	AT2G41180	sigA-binding protein-related	1.15475	0.0404878
267116_at	AT2G32560	F-box family protein	1.51458	0.0111702
267238_at	AT2G44130	kelch repeat-containing F-box family protein	1.846	0.00849673
267293_at	AT2G23810	TET8 (TETRASPANIN8)	1.35093	0.0364968
267357_at	AT2G40000	HSPRO2 (ARABIDOPSIS ORTHOLOG OF SUGAR BEET HS1 PRO-1 2)	2.23278	0.00448598
267557_at	AT2G32710	KRP4; cyclin binding / cyclin-dependent protein kinase inhibitor	1.22798	0.0326471
267591_at	AT2G39705	RTFL8 (ROTUNDIFOLIA LIKE 8)	1.18822	0.0418127
267602_at	AT2G32970	unknown protein	1.33754	0.0228629
267614_at	AT2G26710	BAS1 (PHYB ACTIVATION TAGGED SUPPRESSOR 1); oxygen binding / steroid hydroxylase	1.62332	0.00957576
267623_at	AT2G39650	unknown protein	1.33718	0.0495184

## Sheet: Down-regulated
ID Affymetrix	Locus	Description	Fold change (Log2)	p-value
244932_at	ATCG01060	Encodes the PsaC subunit of photosystem I.	-1.35697	0.00828571
245019_at	ATCG00530	hypothetical protein	-1.7626	0.00486842
245020_at	ATCG00540	Encodes cytochrome f apoprotein; involved in photosynthetic electron transport chain; encoded by the chloroplast genome and is transcriptionally repressed by a nuclear gene HCF2.	-1.33213	0.0183544
245047_at	ATCG00020	Encodes chlorophyll binding protein D1, a part of the photosystem II reaction center core	-1.15356	0.0459533
245152_at	AT2G47490	mitochondrial substrate carrier family protein	-1.30326	0.0166013
245176_at	AT2G47440	DNAJ heat shock N-terminal domain-containing protein	-1.11174	0.0413992
245265_at	AT4G14400	ACD6 (ACCELERATED CELL DEATH 6); protein binding	-1.77144	0.00153846
245266_at	AT4G17070	peptidyl-prolyl cis-trans isomerase	-1.09266	0.0331163
245277_at	AT4G15550	IAGLU (INDOLE-3-ACETATE BETA-D-GLUCOSYLTRANSFERASE); UDP-glycosyltransferase/ transferase, transferring glycosyl groups	-1.85397	0.00102564
245346_at	AT4G17090	CT-BMY (CHLOROPLAST BETA-AMYLASE); beta-amylase	-1.39086	0.0131496
245349_at	AT4G16690	MES16 (METHYL ESTERASE 16); catalytic/ hydrolase, acting on ester bonds / methyl indole-3-acetate esterase/ methyl jasmonate esterase	-1.39615	0.0121368
245352_at	AT4G15490	UGT84A3; UDP-glycosyltransferase/ sinapate 1-glucosyltransferase/ transferase, transferring glycosyl groups	-1.13226	0.0475926
245370_at	AT4G16840	unknown protein	-1.07205	0.0468321
245427_at	AT4G17550	transporter-related	-1.22023	0.0248438
245479_at	AT4G16140	proline-rich family protein	-1.41215	0.00899083
245740_at	AT1G44100	AAP5; amino acid transmembrane transporter/ basic amino acid transmembrane transporter	-1.25981	0.0190123
245750_at	AT1G51060	HTA10; DNA binding	-1.16579	0.0288835
245816_at	AT1G26210	unknown protein	-1.70686	0.00183333
245936_at	AT5G19850	hydrolase, alpha/beta fold family protein	-1.19184	0.0291866
245987_at	AT5G13180	ANAC083 (ARABIDOPSIS NAC DOMAIN CONTAINING PROTEIN 83); transcription factor	-1.5958	0.00414286
246001_at	AT5G20790	unknown protein	-1.79611	0.00150943
246069_at	AT5G20220	zinc knuckle (CCHC-type) family protein	-1.25984	0.0203529
246120_at	AT5G20360	octicosapeptide/Phox/Bem1p (PB1) domain-containing protein / tetratricopeptide repeat (TPR)-containing protein	-1.26618	0.0214943
246125_at	AT5G19875	unknown protein	-1.96455	0.000294118
246247_at	AT4G36640	SEC14 cytosolic factor family protein / phosphoglyceride transfer family protein	-1.57409	0.00535714
246310_at	AT3G51895	SULTR3;1 (SULFATE TRANSPORTER 3;1); secondary active sulfate transmembrane transporter/ sulfate transmembrane transporter/ transporter	-1.27411	0.019939
246468_at	AT5G17050	UGT78D2 (UDP-GLUCOSYL TRANSFERASE 78D2); UDP-glycosyltransferase/ anthocyanidin 3-O-glucosyltransferase/ quercetin 3-O-glucosyltransferase/ transferase, transferring glycosyl groups	-1.95849	0
246490_at	AT5G15950;AT5G15948	[AT5G15950, adenosylmethionine decarboxylase family protein];[AT5G15948, CPuORF10 (Conserved peptide upstream open reading frame 10)]	-3.07096	0
246597_at	AT5G14760	AO (L-ASPARTATE OXIDASE); L-aspartate oxidase/ electron carrier/ oxidoreductase	-2.73407	0
246612_at	AT5G35320	unknown protein	-1.44162	0.0122609
246633_at	AT1G29720	protein kinase family protein	-1.1715	0.0278571
246797_at	AT5G26790	unknown protein	-1.10331	0.0318779
246884_at	AT5G26220	ChaC-like family protein	-1.22985	0.0359193
247055_at	AT5G66740	unknown protein	-1.13125	0.0362667
247193_at	AT5G65380	ripening-responsive protein, putative	-1.27764	0.0166887
247406_at	AT5G62920	ARR6 (RESPONSE REGULATOR 6); transcription regulator/ two-component response regulator	-1.1417	0.0362115
247600_at	AT5G60890	MYB34 (MYB DOMAIN PROTEIN 34); DNA binding / kinase/ transcription activator/ transcription factor	-1.16679	0.0390517
247704_at	AT5G59510	RTFL5 (ROTUNDIFOLIA LIKE 5)	-1.25295	0.0196988
247706_at	AT5G59480	haloacid dehalogenase-like hydrolase family protein	-1.09434	0.0385217
247734_at	AT5G59400	unknown protein	-1.26055	0.0248691
247779_at	AT5G58760	DDB2 (damaged DNA-binding 2); nucleic acid binding / nucleotide binding / zinc ion binding	-1.2501	0.0220112
247780_at	AT5G58770	dehydrodolichyl diphosphate synthase, putative / DEDOL-PP synthase, putative	-1.45559	0.0130081
247800_at	AT5G58570	unknown protein	-1.34472	0.0134848
247820_at	AT5G58380	SIP1 (SOS3-INTERACTING PROTEIN 1); ATP binding / kinase/ protein kinase/ protein serine/threonine kinase	-1.20678	0.0232973
247924_at	AT5G57655	xylose isomerase family protein	-1.17566	0.0468462
247980_at	AT5G56860	GNC (GATA, nitrate-inducible, carbon metabolism-involved); transcription factor	-1.55343	0.00445946
248028_at	AT5G55620	unknown protein	-1.62568	0.00493671
248080_at	AT5G55380	membrane bound O-acyl transferase (MBOAT) family protein / wax synthase-related	-1.09875	0.0362882
248148_at	AT5G54930	AT hook motif-containing protein	-1.37429	0.0133594
248160_at	AT5G54470	zinc finger (B-box type) family protein	-1.12436	0.0362946
248191_at	AT5G54130	calcium-binding EF hand family protein	-3.0917	0
248207_at	AT5G53970	aminotransferase, putative	-1.96855	0
248246_at	AT5G53200	TRY (TRIPTYCHON); DNA binding / transcription factor	-1.93896	0.00027027
248311_at	AT5G52570	BETA-OHASE 2 (BETA-CAROTENE HYDROXYLASE 2); carotene beta-ring hydroxylase	-1.29627	0.0215429
248327_at	AT5G52750	heavy-metal-associated domain-containing protein	-0.923192	0.0406276
248607_at	AT5G49480	ATCP1 (Ca2+-binding protein 1); calcium ion binding	-1.74065	0.00189655
248646_at	AT5G49100	unknown protein	-1.68165	0.00432836
248676_at	AT5G48850	ATSDI1 (SULPHUR DEFICIENCY-INDUCED 1); binding	-1.70482	0.00481481
248759_at	AT5G47610	zinc finger (C3HC4-type RING finger) family protein	-1.26652	0.0219444
248820_at	AT5G47060	senescence-associated protein-related	-0.99948	0.0490476
248978_at	AT5G45070	AtPP2-A8 (Phloem protein 2-A8); carbohydrate binding	-1.38968	0.0178344
249063_at	AT5G44110	POP1; transporter	-2.1404	0
249144_at	AT5G43270	SPL2 (SQUAMOSA PROMOTER BINDING PROTEIN-LIKE 2); DNA binding / transcription factor	-1.06968	0.0390129
249171_at	AT5G42940	zinc finger (C3HC4-type RING finger) family protein	-1.08284	0.0398729
249191_at	AT5G42760	INVOLVED IN: biological_process unknown; LOCATED IN: cellular_component unknown; EXPRESSED IN: 21 plant structures; EXPRESSED DURING: 13 growth stages; CONTAINS InterPro DOMAIN/s: Conserved hypothetical protein CHP00027, methylltransferase (InterPro:IPR011610), O-methyltransferase, N-terminal (InterPro:IPR003455); Has 888 Blast hits to 888 proteins in 139 species: Archae - 36; Bacteria - 741; Met…	-3.96632	0
249752_at	AT5G24660	LSU2 (RESPONSE TO LOW SULFUR 2)	-3.74758	0
249759_at	AT5G24380	YSL2 (YELLOW STRIPE LIKE 2); oligopeptide transporter	-1.38759	0.0115789
249765_at	AT5G24030	SLAH3 (SLAC1 HOMOLOGUE 3); transporter	-1.3177	0.0143662
249769_at	AT5G24120	SIGE (SIGMA FACTOR E); DNA binding / DNA-directed RNA polymerase/ sigma factor/ transcription factor	-1.83952	0.00130435
249798_at	AT5G23730	nucleotide binding	-2.05744	0
249800_at	AT5G23660	MTN3 (Arabidopsis homolog of Medicago truncatula MTN3)	-1.09581	0.0447036
249811_at	AT5G23760	heavy-metal-associated domain-containing protein	-1.09275	0.0438645
250054_at	AT5G17860	CAX7 (calcium exchanger 7); calcium:sodium antiporter/ cation:cation antiporter	-1.52985	0.00765957
250151_at	AT5G14570	ATNRT2.7 (Arabidopsis thaliana high affinity nitrate transporter 2.7); nitrate transmembrane transporter	-1.26222	0.0198773
250287_at	AT5G13330	Rap2.6L (related to AP2 6L); DNA binding / transcription factor	-1.20022	0.0233511
250350_at	AT5G12010	unknown protein	-1.22771	0.0230055
250420_at	AT5G11260	HY5 (ELONGATED HYPOCOTYL 5); DNA binding / double-stranded DNA binding / transcription factor	-2.28812	0
250438_at	AT5G10580	unknown protein	-1.15602	0.04075
250690_at	AT5G06530	ABC transporter family protein	-1.52249	0.00674157
250926_at	AT5G03555	permease, cytosine/purines, uracil, thiamine, allantoin family protein	-1.43956	0.00973214
251020_at	AT5G02270	ATNAP9; transporter	-1.5793	0.00408451
251072_at	AT5G01740	FUNCTIONS IN: molecular_function unknown; INVOLVED IN: biological_process unknown; LOCATED IN: cellular_component unknown; EXPRESSED IN: 18 plant structures; EXPRESSED DURING: 9 growth stages; CONTAINS InterPro DOMAIN/s: Wound-induced protein, Wun1 (InterPro:IPR009798); BEST Arabidopsis thaliana protein match is: SAG20 (SENESCENCE ASSOCIATED GENE 20) (TAIR:AT3G10985.1); Has 49 Blast hits to 49 pr…	-2.67909	0
251309_at	AT3G61220	short-chain dehydrogenase/reductase (SDR) family protein	-1.47055	0.0087963
251360_at	AT3G61210	embryo-abundant protein-related	-1.06737	0.0470677
251372_at	AT3G60520	unknown protein	-1.14373	0.0317453
251629_at	AT3G57410	VLN3 (VILLIN 3); actin binding	-1.21255	0.023172
251658_at	AT3G57020	strictosidine synthase family protein	-1.39427	0.013254
251722_at	AT3G56200	amino acid transporter family protein	-1.37104	0.020407
251727_at	AT3G56290	unknown protein	-1.19014	0.0321495
251775_s_at	AT2G39800;AT3G55610	[AT2G39800, P5CS1 (DELTA1-PYRROLINE-5-CARBOXYLATE SYNTHASE 1); delta1-pyrroline-5-carboxylate synthetase];[AT3G55610, P5CS2 (DELTA 1-PYRROLINE-5-CARBOXYLATE SYNTHASE 2); catalytic/ glutamate 5-kinase/ glutamate-5-semialdehyde dehydrogenase/ oxidoreductase]	-1.08313	0.0467816
251811_at	AT3G54990	SMZ (SCHLAFMUTZE); DNA binding / transcription factor	-1.15523	0.031564
251826_at	AT3G55110	ABC transporter family protein	-1.46417	0.00783505
251870_at	AT3G54510	early-responsive to dehydration protein-related / ERD protein-related	-1.44278	0.00900901
251890_at	AT3G54220	SCR (SCARECROW); protein binding / protein homodimerization/ sequence-specific DNA binding / transcription factor	-1.15208	0.026943
251895_at	AT3G54420	ATEP3; chitinase	-1.24601	0.0212139
252010_at	AT3G52740	unknown protein	-1.46158	0.00763441
252037_at	AT3G51920	CAM9 (CALMODULIN 9); calcium ion binding	-1.13601	0.0289216
252255_at	AT3G49220	pectinesterase family protein	-1.30386	0.0146154
252303_at	AT3G49210	unknown protein	-1.38269	0.0132308
252315_at	AT3G48690	CXE12; carboxylesterase	-1.12314	0.0345161
252316_at	AT3G48700	ATCXE13 (ARABIDOPSIS THALIANA CARBOXYESTERASE 13); hydrolase	-1.18693	0.0232086
252363_at	AT3G48460	GDSL-motif lipase/hydrolase family protein	-1.86419	0.00125
252411_at	AT3G47430	PEX11B	-1.35968	0.0143262
252414_at	AT3G47420	glycerol-3-phosphate transporter, putative / glycerol 3-phosphate permease, putative	-1.53719	0.00604651
252619_at	AT3G45210	unknown protein	-1.99881	0.00030303
252624_at	AT3G44735	PSK1; growth factor	-1.60453	0.004
252648_at	AT3G44630	disease resistance protein RPP1-WsB-like (TIR-NBS-LRR class), putative	-1.39013	0.0100885
252661_at	AT3G44450	unknown protein	-3.41247	0
253074_at	AT4G36140	disease resistance protein (TIR-NBS-LRR class), putative	-1.04038	0.0419512
253247_at	AT4G34610	BLH6 (BELL1-LIKE HOMEODOMAIN 6); DNA binding / transcription factor	-1.48797	0.0078125
253252_at	AT4G34740	ATASE2 (GLN PHOSPHORIBOSYL PYROPHOSPHATE AMIDOTRANSFERASE 2); amidophosphoribosyltransferase	-1.21712	0.0231319
253264_at	AT4G33950	OST1 (OPEN STOMATA 1); calcium-dependent protein serine/threonine kinase/ kinase/ protein kinase	-1.1449	0.0361062
253298_at	AT4G33560	unknown protein	-1.2994	0.0198204
253326_at	AT4G33440	glycoside hydrolase family 28 protein / polygalacturonase (pectinase) family protein	-1.14075	0.0283168
253638_at	AT4G30470	cinnamoyl-CoA reductase-related	-1.36406	0.0136232
253814_at	AT4G28290	unknown protein	-1.12433	0.0393191
253922_at	AT4G26850	VTC2 (vitamin c defective 2); GDP-D-glucose phosphorylase/ GDP-galactose:glucose-1-phosphate guanyltransferase/ GDP-galactose:mannose-1-phosphate guanyltransferase/ GDP-galactose:myoinositol-1-phosphate guanyltransferase/ galactose-1-phosphate guanylyltra	-1.13923	0.0421053
254016_at	AT4G26150	CGA1 (CYTOKININ-RESPONSIVE GATA FACTOR 1); transcription factor	-3.28657	0
254077_at	AT4G25640	MATE efflux family protein	-1.46022	0.00785714
254235_at	AT4G23750	CRF2 (CYTOKININ RESPONSE FACTOR 2); DNA binding / transcription factor	-1.24513	0.0167532
254343_at	AT4G21990	APR3 (APS REDUCTASE 3); adenylyl-sulfate reductase	-2.17601	0.000277778
254508_at	AT4G20170	unknown protein	-1.70195	0.00186441
254577_at	AT4G19450	nodulin-related	-1.61634	0.00409091
254693_at	AT4G17880	basic helix-loop-helix (bHLH) family protein	-1.26782	0.0279695
254707_at	AT4G18010	AT5PTASE2 (MYO-INOSITOL POLYPHOSPHATE 5-PHOSPHATASE 2); inositol-polyphosphate 5-phosphatase	-1.11538	0.0385714
254850_at	AT4G12000	INVOLVED IN: response to oxidative stress; EXPRESSED IN: 22 plant structures; EXPRESSED DURING: 13 growth stages; CONTAINS InterPro DOMAIN/s: SNARE associated Golgi protein (InterPro:IPR015414); BEST Arabidopsis thaliana protein match is: unknown protein (TAIR:AT4G22850.1); Has 1153 Blast hits to 1150 proteins in 277 species: Archae - 2; Bacteria - 485; Metazoa - 104; Fungi - 24; Plants - 140; Vi…	-1.49752	0.00681319
255011_at	AT4G10040	CYTC-2 (cytochrome c-2); electron carrier/ heme binding / iron ion binding	-1.54563	0.005
255116_at	AT4G08850	kinase	-1.13358	0.0285222
255284_at	AT4G04610	APR1 (APS REDUCTASE 1); adenylyl-sulfate reductase	-1.77784	0.00597701
255403_at	AT4G03400	DFL2 (DWARF IN LIGHT 2)	-1.82051	0.00133333
255479_at	AT4G02380	SAG21 (SENESCENCE-ASSOCIATED GENE 21)	-1.41747	0.0120339
255503_at	AT4G02420	lectin protein kinase, putative	-1.45639	0.00836538
255604_at	AT4G01080	unknown protein	-1.16273	0.0420161
255622_at	AT4G01070	GT72B1; UDP-glucosyltransferase/ UDP-glycosyltransferase/ transferase, transferring glycosyl groups	-1.18221	0.028191
255694_at	AT4G00050	UNE10 (unfertilized embryo sac 10); DNA binding / transcription factor	-1.4298	0.0132353
255795_at	AT2G33380	RD20 (RESPONSIVE TO DESSICATION 20); calcium ion binding	-1.2167	0.0364474
256069_at	AT1G13740	AFP2 (ABI FIVE BINDING PROTEIN 2)	-1.29901	0.0133333
256578_at	AT3G28200	peroxidase, putative	-1.31212	0.0153472
256598_at	AT3G30180	BR6OX2 (BRASSINOSTEROID-6-OXIDASE 2); monooxygenase/ oxygen binding	-1.25037	0.0217614
256725_at	AT2G34070	unknown protein	-1.34265	0.0139568
256751_at	AT3G27170	CLC-B (CHLORIDE CHANNEL B); anion channel/ voltage-gated chloride channel	-1.34149	0.0184472
256999_at	AT3G14200	DNAJ heat shock N-terminal domain-containing protein	-2.53026	0
257057_at	AT3G15310	transposable element gene	-3.2855	0
257203_at	AT3G23730	xyloglucan:xyloglucosyl transferase, putative / xyloglucan endotransglycosylase, putative / endo-xyloglucan transferase, putative	-1.32296	0.0131405
257262_at	AT3G21890	zinc finger (B-box type) family protein	-3.18337	0
257314_at	AT3G26590	MATE efflux family protein	-1.06864	0.0458915
257666_at	AT3G20270	lipid-binding serum glycoprotein family protein	-1.14871	0.0289268
257880_at	AT3G16910	AAE7 (ACYL-ACTIVATING ENZYME 7); AMP binding / acetate-CoA ligase	-1.58428	0.00424658
257916_at	AT3G23210	basic helix-loop-helix (bHLH) family protein	-1.48098	0.00659091
257954_at	AT3G21760	UDP-glucoronosyl/UDP-glucosyl transferase family protein	-1.56939	0.004875
258081_at	AT3G26085	CAAX amino terminal protease family protein	-1.06012	0.0466288
258133_at	AT3G24500	MBF1C (MULTIPROTEIN BRIDGING FACTOR 1C); DNA binding / transcription coactivator/ transcription factor	-2.62358	0
258158_at	AT3G17790	PAP17; acid phosphatase/ phosphatase/ protein serine/threonine phosphatase	-1.13146	0.0490545
258167_at	AT3G21560	UGT84A2; UDP-glycosyltransferase/ sinapate 1-glucosyltransferase	-1.81462	0.00146341
258181_at	AT3G21670	nitrate transporter (NTP3)	-1.27884	0.0221469
258299_at	AT3G23410	alcohol oxidase-related	-1.21213	0.0289372
258315_at	AT3G16175	thioesterase family protein	-1.57004	0.00512195
258321_at	AT3G22840	ELIP1 (EARLY LIGHT-INDUCABLE PROTEIN); chlorophyll binding	-1.39693	0.0129032
258336_at	AT3G16050	A37; protein heterodimerization	-1.80332	0.00148148
258349_at	AT3G17609	HYH (HY5-HOMOLOG); DNA binding / transcription factor	-2.63742	0
258406_at	AT3G17611	ATRBL14 (ARABIDOPSIS RHOMBOID-LIKE PROTEIN 14); zinc ion binding	-1.39289	0.0121552
258609_at	AT3G02910	FUNCTIONS IN: molecular_function unknown; INVOLVED IN: biological_process unknown; LOCATED IN: cellular_component unknown; EXPRESSED IN: 23 plant structures; EXPRESSED DURING: 15 growth stages; CONTAINS InterPro DOMAIN/s: Butirosin biosynthesis, BtrG-like (InterPro:IPR013024), AIG2-like (InterPro:IPR009288); BEST Arabidopsis thaliana protein match is: unknown protein (TAIR:AT5G46720.1); Has 210 B…	-1.04335	0.0458203
258677_at	AT3G08730	PK1 (PROTEIN-SERINE KINASE 1); kinase/ protein binding / protein kinase/ protein serine/threonine kinase	-1.90967	0.000285714
258723_at	AT3G09600	myb family transcription factor	-2.04078	0.0012
258724_at	AT3G09600	myb family transcription factor	-1.65948	0.00789474
258742_at	AT3G05800	transcription factor	-1.03497	0.0436905
258757_at	AT3G10912;AT3G10910	[AT3G10912, CPuORF63 (Conserved peptide upstream open reading frame 63)];[AT3G10910, zinc finger (C3HC4-type RING finger) family protein]	-1.2649	0.0202339
258998_at	AT3G01820	adenylate kinase family protein	-1.27421	0.0184277
259037_at	AT3G09350	armadillo/beta-catenin repeat family protein	-1.53641	0.0129167
259432_at	AT1G01520	myb family transcription factor	-2.98842	0
259507_at	AT1G43910	AAA-type ATPase family protein	-1.04689	0.0421285
259629_at	AT1G56510	WRR4 (WHITE RUST RESISTANCE 4); ATP binding / nucleoside-triphosphatase/ nucleotide binding / transmembrane receptor	-2.08007	0
259705_at	AT1G77450	anac032 (Arabidopsis NAC domain containing protein 32); transcription factor	-1.27193	0.0198182
259864_at	AT1G72800	nuM1-related	-1.06359	0.0407884
259922_at	AT1G72770	HAB1 (HOMOLOGY TO ABI1); catalytic/ protein serine/threonine phosphatase	-1.35191	0.014
259970_at	AT1G76570	chlorophyll A-B binding family protein	-1.05122	0.0471536
260030_at	AT1G68880	AtbZIP (Arabidopsis thaliana basic leucine-zipper 8); DNA binding / transcription factor	-1.12825	0.0284
260081_at	AT1G78170	unknown protein	-1.49111	0.00803922
260209_at	AT1G68552;AT1G68550	[AT1G68552, CPuORF53 (Conserved peptide upstream open reading frame 53)];[AT1G68550, AP2 domain-containing transcription factor, putative]	-1.29568	0.0153425
260248_at	AT1G74310	ATHSP101 (ARABIDOPSIS THALIANA HEAT SHOCK PROTEIN 101); ATP binding / ATPase/ nucleoside-triphosphatase/ nucleotide binding / protein binding	-1.95697	0.00192982
260337_at	AT1G69310	WRKY57; transcription factor	-1.29819	0.0169677
260380_at	AT1G73870	zinc finger (B-box type) family protein	-1.66492	0.00177419
260427_at	AT1G72430	auxin-responsive protein-related	-1.13749	0.0354955
260592_at	AT1G55850	ATCSLE1; cellulose synthase/ transferase, transferring glycosyl groups	-1.32847	0.0132558
260601_at	AT1G55910	ZIP11 (ZINC TRANSPORTER 11 PRECURSOR); cation transmembrane transporter/ metal ion transmembrane transporter	-1.56306	0.0053012
260603_at	AT1G55960	FUNCTIONS IN: molecular_function unknown; INVOLVED IN: biological_process unknown; EXPRESSED IN: 24 plant structures; EXPRESSED DURING: 15 growth stages; CONTAINS InterPro DOMAIN/s: Lipid-binding START (InterPro:IPR002913); BEST Arabidopsis thaliana protein match is: unknown protein (TAIR:AT3G13062.2); Has 177 Blast hits to 177 proteins in 41 species: Archae - 0; Bacteria - 0; Metazoa - 79; Fungi…	-1.83283	0.00142857
260727_at	AT1G48100	glycoside hydrolase family 28 protein / polygalacturonase (pectinase) family protein	-1.41192	0.00909091
260784_at	AT1G06180	ATMYB13 (MYB DOMAIN PROTEIN 13); DNA binding / transcription factor	-2.19343	0
260830_at	AT1G06760	histone H1, putative	-1.33964	0.0131148
260831_at	AT1G06830	glutaredoxin family protein	-1.03236	0.0456863
260975_at	AT1G53430	leucine-rich repeat family protein / protein kinase family protein	-1.20868	0.0220787
261081_at	AT1G07350	transformer serine/arginine-rich ribonucleoprotein, putative	-1.3607	0.0161745
261177_at	AT1G04770	male sterility MS5 family protein	-3.29483	0
261191_at	AT1G32900	starch synthase, putative	-1.15009	0.0469057
261247_at	AT1G20070	unknown protein	-2.58548	0
261319_at	AT1G53090	SPA4 (SPA1-RELATED 4); protein binding / signal transducer	-1.62639	0.0042029
261407_at	AT1G18810	phytochrome kinase substrate-related	-1.09073	0.0404219
261420_at	AT1G07720	KCS3 (3-KETOACYL-COA SYNTHASE 3); acyltransferase/ catalytic/ transferase, transferring acyl groups other than amino-acyl groups	-1.25579	0.0289904
261456_at	AT1G21050	unknown protein	-1.04555	0.0414463
261618_at	AT1G33110	MATE efflux family protein	-1.42103	0.00878505
261651_at	AT1G27760	interferon-related developmental regulator family protein / IFRD protein family	-1.21508	0.0283085
261717_at	AT1G18400	BEE1 (BR Enhanced Expression 1); transcription factor	-1.03007	0.0477122
261758_at	AT1G08250	ADT6 (arogenate dehydratase 6); arogenate dehydratase/ prephenate dehydratase	-1.28008	0.0228177
261914_at	AT1G65870	disease resistance-responsive family protein	-2.81579	0
261958_at	AT1G64500	glutaredoxin family protein	-1.64001	0.0028125
261975_at	AT1G64640	plastocyanin-like domain-containing protein	-0.993729	0.0477206
262045_at	AT1G80240	unknown protein	-1.03033	0.0491606
262050_at	AT1G80130	binding	-1.46567	0.00792079
262113_at	AT1G02820	late embryogenesis abundant 3 family protein / LEA3 family protein	-2.08393	0.000526316
262158_at	AT1G52540	protein kinase, putative	-1.34693	0.0135338
262164_at	AT1G78070	FUNCTIONS IN: molecular_function unknown; INVOLVED IN: biological_process unknown; LOCATED IN: CUL4 RING ubiquitin ligase complex; EXPRESSED IN: 23 plant structures; EXPRESSED DURING: 13 growth stages; CONTAINS InterPro DOMAIN/s: WD40 repeat-like (InterPro:IPR011046), WD40 repeat, region (InterPro:IPR017986), WD40/YVTN repeat-like (InterPro:IPR015943), WD40 repeat (InterPro:IPR001680); BEST Arabi…	-1.17114	0.0347032
262290_at	AT1G70985	hydroxyproline-rich glycoprotein family protein	-2.09494	0
262536_at	AT1G17100	SOUL heme-binding family protein	-1.2668	0.0172436
262552_at	AT1G31350	F-box family protein	-1.47216	0.00611765
262590_at	AT1G15100	RHA2A; protein binding / ubiquitin-protein ligase/ zinc ion binding	-1.74426	0.00196429
262656_at	AT1G14200	zinc finger (C3HC4-type RING finger) family protein	-1.25532	0.0273711
262883_at	AT1G64780	ATAMT1;2 (AMMONIUM TRANSPORTER 1;2); ammonium transmembrane transporter	-1.74137	0.00180328
262911_s_at	AT1G59860;AT1G07400	[AT1G59860, 17.6 kDa class I heat shock protein (HSP17.6A-CI)];[AT1G07400, 17.8 kDa class I heat shock protein (HSP17.8-CI)]	-2.96099	0
262935_at	AT1G79410	AtOCT5 (Arabidopsis thaliana ORGANIC CATION/CARNITINE TRANSPORTER5); carbohydrate transmembrane transporter/ sugar:hydrogen symporter	-1.96331	0.0003125
263122_at	AT1G78510	SPS1 (solanesyl diphosphate synthase 1); trans-octaprenyltranstransferase	-1.67682	0.00253968
263150_at	AT1G54050	17.4 kDa class III heat shock protein (HSP17.4-CIII)	-2.4457	0
263252_at	AT2G31380	STH; protein domain specific binding / transcription factor/ zinc ion binding	-1.04364	0.0495652
263374_at	AT2G20560	DNAJ heat shock family protein	-1.60677	0.00771739
263421_at	AT2G17230	EXL5 (EXORDIUM LIKE 5)	-1.3363	0.0165789
263545_at	AT2G21560	unknown protein	-1.27066	0.0229891
263556_at	AT2G16365	F-box family protein	-1.1677	0.0317143
263632_at	AT2G04795	unknown protein	-1.27186	0.0167333
263739_at	AT2G21320	zinc finger (B-box type) family protein	-1.63059	0.00402778
263777_at	AT2G46450	ATCNGC12; cation channel/ cyclic nucleotide binding / ion channel	-1.30278	0.0161486
263796_at	AT2G24540	AFR (ATTENUATED FAR-RED RESPONSE)	-1.80614	0.0012766
263847_at	AT2G36970	UDP-glucoronosyl/UDP-glucosyl transferase family protein	-1.12788	0.0349091
264006_at	AT2G22430	ATHB6; DNA binding / protein binding / sequence-specific DNA binding / transcription activator/ transcription factor	-1.50731	0.00677778
264091_at	AT1G79110	protein binding / zinc ion binding	-1.31937	0.0132061
264096_at	AT1G78995	unknown protein	-1.04556	0.0472761
264102_at	AT1G79270	ECT8 (evolutionarily conserved C-terminal region 8)	-1.90926	0.00136364
264130_at	AT1G79160	unknown protein	-1.57191	0.00493506
264264_at	AT1G09250	transcription factor	-1.81826	0.00139535
264385_at	AT1G12020	unknown protein	-1.19697	0.0272308
264605_at	AT1G04550	IAA12 (AUXIN-INDUCED PROTEIN 12); transcription factor/ transcription repressor	-1.0906	0.0405042
264613_at	AT1G04640	LIP2 (LIPOYLTRANSFERASE 2); lipoyltransferase	-1.51615	0.00858491
264636_at	AT1G65490	unknown protein	-1.00398	0.0475093
264696_at	AT1G70230	unknown protein	-1.11039	0.0420408
264745_at	AT1G62180	APR2 (5'ADENYLYLPHOSPHOSULFATE REDUCTASE 2); adenylyl-sulfate reductase/ phosphoadenylyl-sulfate reductase (thioredoxin)	-2.74703	0
264767_at	AT1G61380	SD1-29 (S-DOMAIN-1 29); carbohydrate binding / kinase/ protein kinase	-1.21288	0.0243915
264894_at	AT1G23040	hydroxyproline-rich glycoprotein family protein	-1.07606	0.0468061
264898_at	AT1G23205	invertase/pectin methylesterase inhibitor family protein	-1.60111	0.00426471
264909_at	AT2G17300	unknown protein	-1.83081	0.00181818
265066_at	AT1G03870	FLA9 (FASCICLIN-LIKE ARABINOOGALACTAN 9)	-1.02378	0.0465251
265200_s_at	AT2G36800;AT2G36790	[AT2G36800, DOGT1 (DON-GLUCOSYLTRANSFERASE 1); UDP-glycosyltransferase/ cis-zeatin O-beta-D-glucosyltransferase/ glucosyltransferase/ quercetin 4'-O-glucosyltransferase/ quercetin 7-O-glucosyltransferase/ trans-zeatin O-beta-D-glucosyltransferase/ transferase, transf];[AT2G36790, UGT73C6 (UDP-glucosyl transferase 73C6); UDP-glucosyltransferase/ UDP-glycosyltransferase/ quercetin 3-O-glucosyltrans…	-1.61365	0.0048
265634_at	AT2G25530	AFG1-like ATPase family protein	-1.0951	0.0348416
265665_at	AT2G27420	cysteine proteinase, putative	-2.41177	0
265740_at	AT2G01150	RHA2B (RING-H2 FINGER PROTEIN 2B); protein binding / ubiquitin-protein ligase/ zinc ion binding	-1.03017	0.04388
265742_at	AT2G01290	ribose-5-phosphate isomerase	-1.77835	0.00156863
265892_at	AT2G15020	unknown protein	-1.38291	0.0152414
265939_at	AT2G19650	DC1 domain-containing protein	-1.8802	0.00125
266155_at	no_match	no_match	-1.51803	0.008
266296_at	AT2G29420	ATGSTU7 (ARABIDOPSIS THALIANA GLUTATHIONE S-TRANSFERASE TAU 7); glutathione transferase	-1.14533	0.0336574
266368_at	AT2G41380	embryo-abundant protein-related	-1.82295	0.00122449
266371_at	AT2G41410	calmodulin, putative	-1.10334	0.0346789
266532_at	AT2G16890	UDP-glucoronosyl/UDP-glucosyl transferase family protein	-1.26341	0.0203571
266555_at	AT2G46270	GBF3 (G-BOX BINDING FACTOR 3); sequence-specific DNA binding / transcription factor	-1.35134	0.0134328
266719_at	AT2G46830	CCA1 (CIRCADIAN CLOCK ASSOCIATED 1); DNA binding / transcription activator/ transcription factor/ transcription repressor	-1.28235	0.0202367
266720_s_at	AT2G46790;AT2G46670	[AT2G46790, APRR9 (ARABIDOPSIS PSEUDO-RESPONSE REGULATOR 9); protein binding / transcription regulator/ two-component response regulator];[AT2G46670, pseudo-response regulator, putative / timing of CAB expression 1-like protein, putative]	-2.15178	0
266820_at	AT2G44940	AP2 domain-containing transcription factor TINY, putative	-1.31837	0.0159864
266841_at	AT2G26150	ATHSFA2; DNA binding / transcription factor	-2.56361	0
267070_at	AT2G41000	heat shock protein binding	-1.07483	0.0415574
267093_at	AT2G38170	CAX1 (cation exchanger 1); calcium ion transmembrane transporter/ calcium:cation antiporter/ calcium:hydrogen antiporter	-1.2008	0.0244211
267132_at	AT2G23420	NAPRT2 (NICOTINATE PHOSPHORIBOSYLTRANSFERASE 2); nicotinate phosphoribosyltransferase	-1.06196	0.0445669
267138_s_at	AT2G38230;AT2G38210	[AT2G38230, ATPDX1.1 (pyridoxine biosynthesis 1.1); protein heterodimerization];[AT2G38210, PDX1L4 (PUTATIVE PDX1-LIKE PROTEIN 4)]	-1.12427	0.0389316
267165_at	AT2G37710	RLK (receptor lectin kinase); kinase	-1.31472	0.0135766
267169_at	AT2G37540	short-chain dehydrogenase/reductase (SDR) family protein	-1.37275	0.01312
267288_at	AT2G23680	stress-responsive protein, putative	-1.35107	0.0122689
267300_at	AT2G30140	UDP-glucoronosyl/UDP-glucosyl transferase family protein	-1.20033	0.0280808
267347_at	AT2G39950	unknown protein	-1.23242	0.0184375
267492_at	AT2G30620	histone H1.2	-1.42049	0.00808081
267535_at	AT2G41940	ZFP8 (ZINC FINGER PROTEIN 8); nucleic acid binding / transcription factor/ zinc ion binding	-1.41618	0.00825243
